# Supplementary figures and images for: Frequency of Androgen Receptor Positivity in Tumors: A Study Evaluating More Than 18,000 Tumors
Source: MDPI journal article supplement (doi:10.3390/biomedicines12050957), 2024-04-25

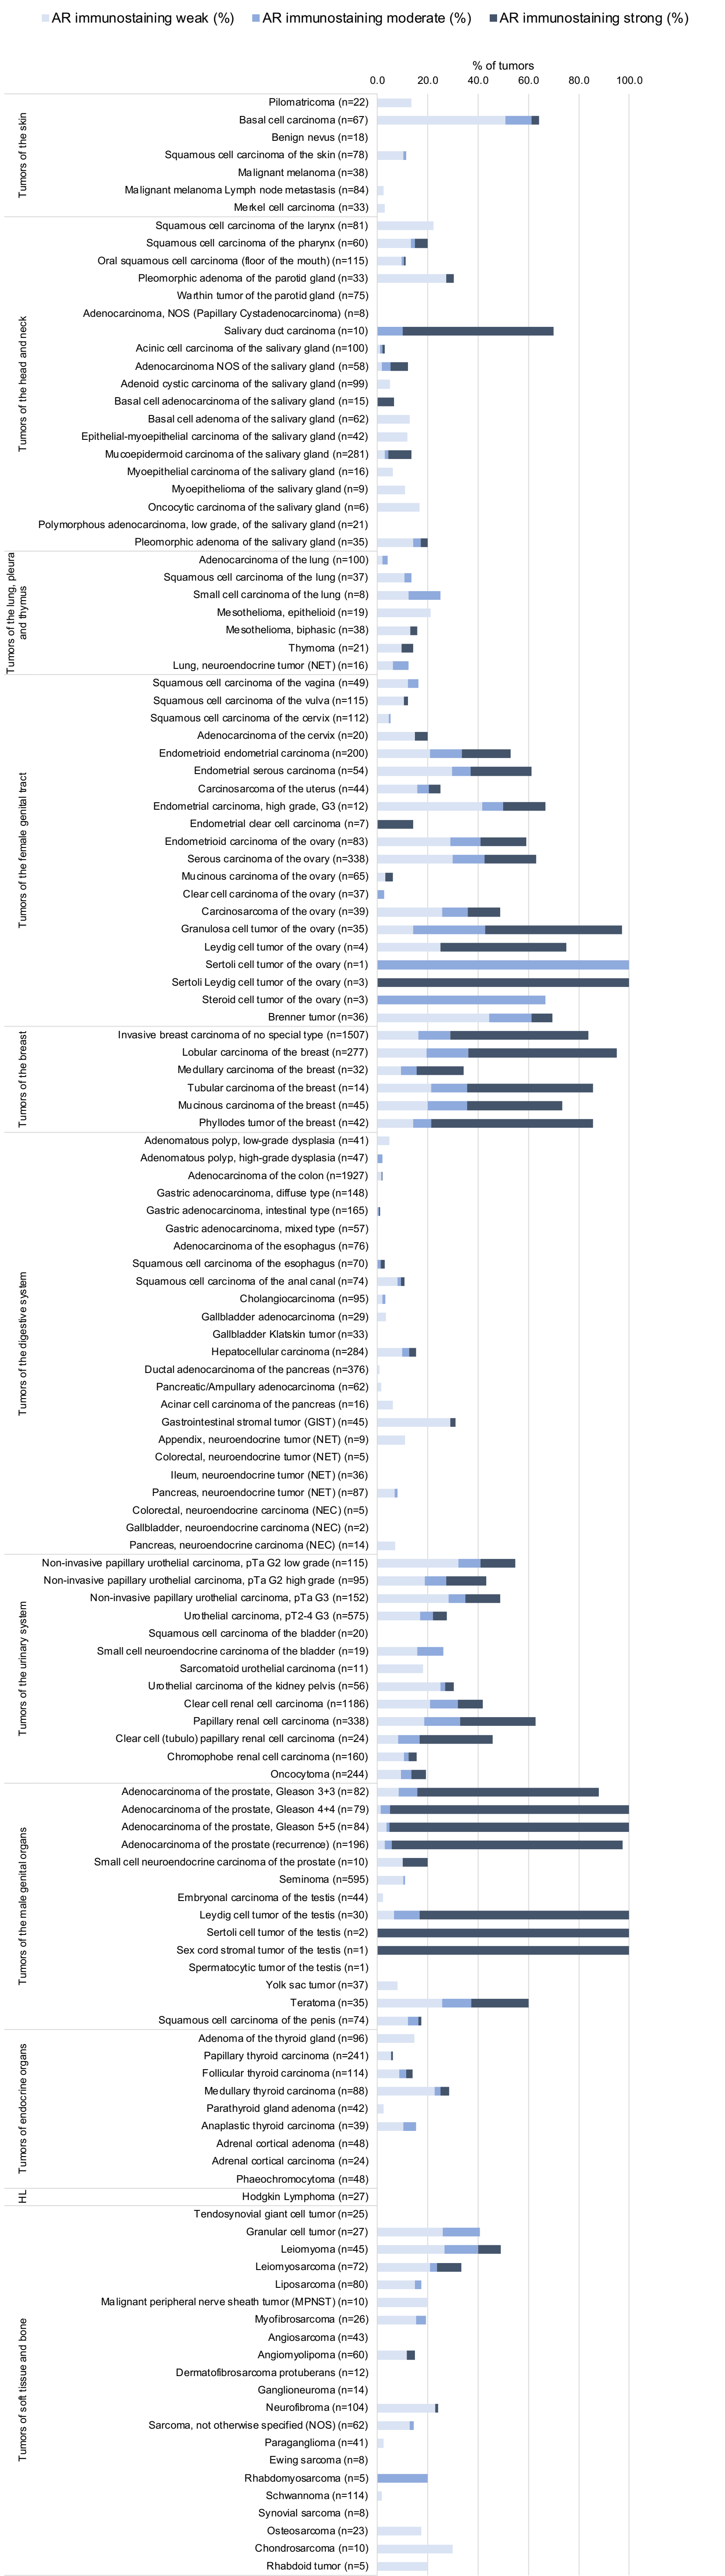

Supplement: s1 [file s1]

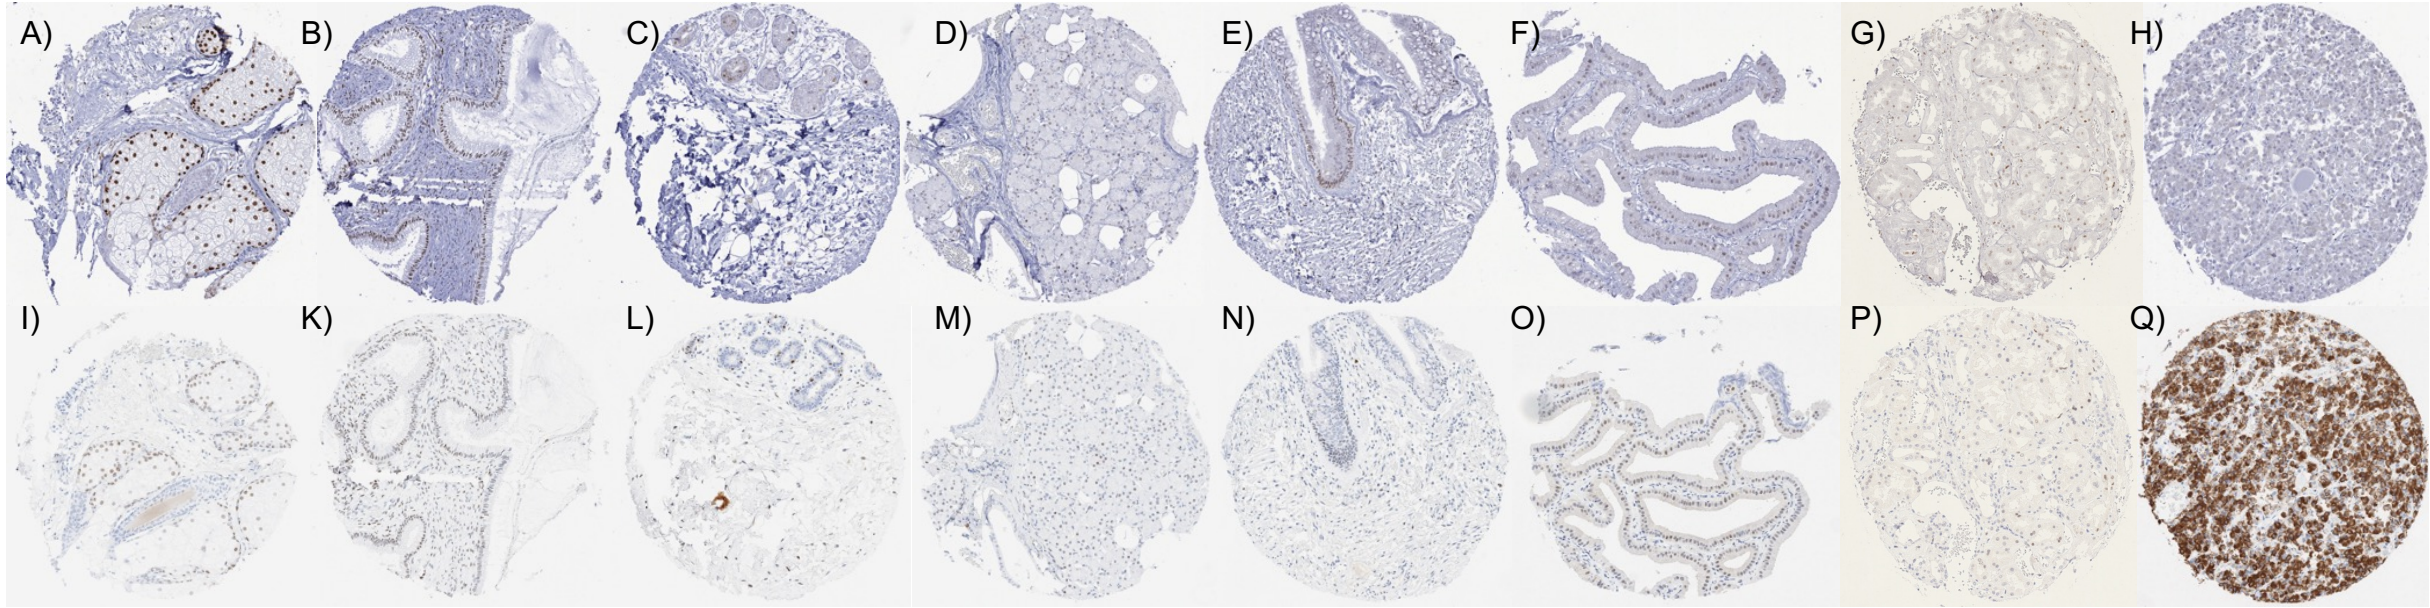

Supplement: s1 [file s1]

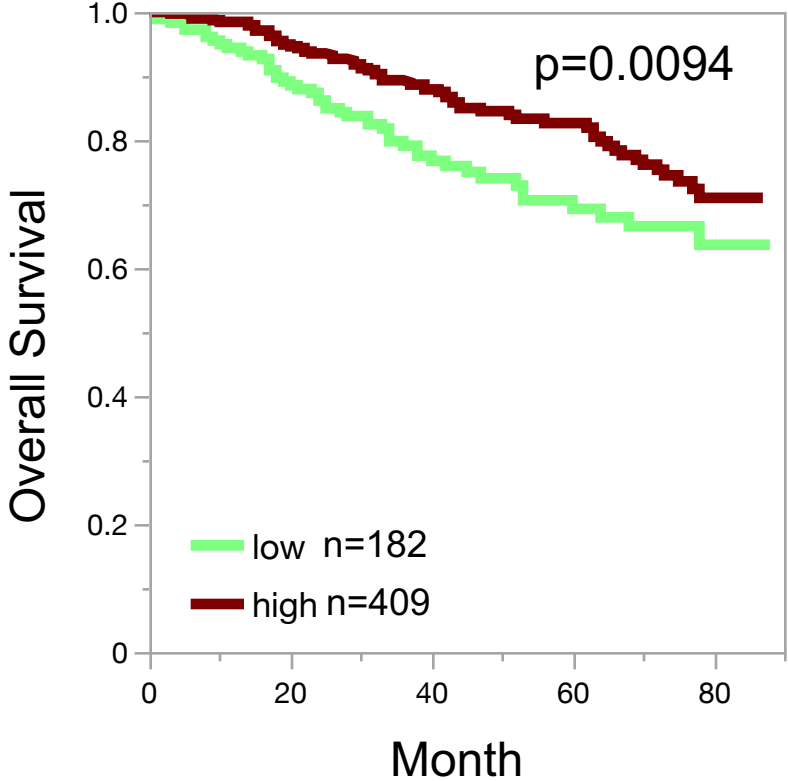

Supplement: s1 [file s1]
